1 **Assessing the efficacy of antibiotic**  
2 **treatment for the creation of axenic**  
3 **earthworms.**

4

5 Henny O. Omosigho<sup>a\*</sup>, Elmer Swart<sup>b</sup>, Tom P. Sizmur<sup>a</sup>, Dave J. Spurgeon<sup>b</sup>, Claus Svendsen<sup>b</sup>  
6 and Liz J. Shaw<sup>a</sup>

7 <sup>a</sup>Department of Geography and Environmental science, University of Reading, Whiteknights,  
8 Reading, RG6 6DW, U.K.

9 <sup>b</sup>UK Centre for Ecology and Hydrology, Wallingford OX10 8BB, UK.

10

11

12 \*Correspondence: Liz J. Shaw, School of Geography and Environmental Sciences,  
13 University of Reading, Whiteknights, Reading, RG6 6DW, U.K

14 Email: [e.j.shaw@reading.ac.uk](mailto:e.j.shaw@reading.ac.uk)

15

16

17

18

19

20

21

22

23

24

25 **Abstract**

26 Earthworms are an integral part of soil ecosystems, especially for their role in soil functions  
27 such as organic matter (OM) decomposition and nutrient cycling. Earthworms and  
28 microorganisms are interdependent, and a considerable portion of the contribution  
29 earthworms make to influencing OM fate is through interactions with microorganisms.  
30 However, the importance of the earthworm-associated microbiome is not fully understood,  
31 because it is difficult to separate the direct influence of the earthworms from the indirect  
32 influence of their microbiome. Here, we evaluated an antibiotic-based procedure for  
33 producing axenic ecologically-contrasting earthworm species (*E. fetida*, *L. terrestris*, *A.*  
34 *chlorotica*) as the first step towards soil studies aimed at understanding the importance of the  
35 earthworm microbiome for host health and function. Individual earthworms were exposed to  
36 antibiotics: cycloheximide (150 µg ml<sup>-1</sup>), ampicillin (100 µg ml<sup>-1</sup>), ciprofloxacin (50 µg ml<sup>-1</sup>),  
37 nalidixic acid (50 µg ml<sup>-1</sup>), and gentamicin (50 µg ml<sup>-1</sup>) either singly or in a cocktail via  
38 culture (96 h) in a semi-solid agar carrier. Compared to the non-antibiotic treated control, the  
39 cocktail (for all three species) and ciprofloxacin (for *E. fetida* and *A. chlorotica*) treatments  
40 significantly reduced (P<0.05) culturable microbial abundance on nutrient agar and potato  
41 dextrose agar. The microbial counts were reduced to below detection (<50 CFU individual<sup>-1</sup>)  
42 for *E. fetida* and *A. chlorotica* receiving the cocktail. Illumina 16S rDNA amplicon sequence  
43 analysis of culturable *L. terrestris* -associated bacteria showed that antibiotic treatment  
44 influenced community composition revealing putative sensitive (*Comomonas*, *Kosakonia* and  
45 *Sphingobacterium*) and insensitive (*Aeromonas*, *Pseudochrobactrum*) taxa. Overall, we  
46 report a rapid, with minimal earthworm- handling, process of creating ‘axenic’ *E. fetida* and  
47 *A. chlorotica* individuals or *L. terrestris* with a suppressed microbiome as a tool to be used in

48 future ecological studies of earthworm microbial interactions affecting host health and  
49 function.

50

51 **Keywords:** Axenic, 16S rDNA, Earthworm-gut associated, *Lumbricus terrestris*, culturable  
52 microbiome

### 53 **1. Introduction**

54 Earthworms are one of the most dominant soil invertebrates in terms of biomass [1,2] and are  
55 frequently referred to as ‘ecosystem engineers’ due to their effects on soil structure and  
56 nutrient availability [3]. Earthworms have been classified into three main ecological  
57 categories (epigeic, endogeic and anecic groups) by Bouché (1977) [4] based on ecological  
58 and morphological characteristics as well as their vertical distribution in the soil profile [4–6].  
59 Epigeic species are surface dwelling, non-burrowing and consume decaying plant residues on  
60 the soil surface. Anecic worms build permanent vertical burrows but feed on plant litters at  
61 the surface or dragged into burrows to be pre-decomposed by microorganisms; endogeic  
62 worms inhabit and feed in organo-mineral and deeper mineral horizons [2,4]. Recently,  
63 Bottinelli et al. 2020 [6] applied a numerical approach to the classification of earthworms to  
64 the ecological categories. This approach enabled a given species to be defined by three  
65 percentages of membership to the three main categories and allowed for species to belong to  
66 supplemental intermediary categories (e.g., epi-anecic or epi-endo-anecic).

67 Earthworms are major players in determining soil organic matter (SOM) dynamics [7,8].

68 Earthworms not only stimulate organic matter (OM) decomposition, but they also promote  
69 SOM stabilization within soil aggregates [9,10]. Decomposition is enhanced both by  
70 increasing the access of microbial decomposers to OM substrates through mixing and  
71 fragmentation of litter [9,11–14] and by stimulating the activity of the ingested soil-derived

72 earthworm gut microbiome, which accelerates the breakdown of earthworm-ingested OM  
73 during gut passage. This latter is referred to as ‘the sleeping beauty paradox’ [3,15]. It  
74 involves the production of intestinal C-rich mucus (‘the kiss’) by the earthworm (‘Prince  
75 Charming’). This process awakens ingested dormant microflora (‘sleeping beauties’) and  
76 thereby increases the decomposition of ingested organic matter because of a ‘priming’ effect  
77 [15–18].

78 It has long been suggested that most earthworm species are not capable of secreting the full  
79 set of enzymes that are required for the depolymerization of plant-derived polymers. Whilst  
80 the possession of endogenous endocellulase genes by some earthworm species has been  
81 reported [19], indicating the ability to digest cellulose, it is thought that even when  
82 earthworms can produce endocellulase, their ability to digest and acquire nutrients from plant  
83 litter lies fundamentally in their relationship with microorganisms [20]. This is because  
84 efficient degradation of a complex polymer such as lignocellulose requires the synergistic  
85 action of suites of enzymes, such as hemicellulase, endocellulase, lignin peroxidase and  
86 exocellulase, that are primarily secreted by microorganisms [21]. The role of the  
87 aforementioned ‘kiss’ may therefore be to stimulate microbial depolymerase production  
88 during gut passage to aid acquisition of nutrients from ingested plant litter. However,  
89 depolymerase activity in soil is a function of recently secreted enzymes, and those produced  
90 in the past and stabilized through association with the soil matrix [22,23]. Therefore, it is not  
91 clear if earthworms rely on the microbial production of enzymes during gut transit, or, if  
92 already produced enzymes (before ingestion) are sufficient for complete depolymerisation. In  
93 the latter case, earthworms would not depend on ingested microorganisms themselves, but  
94 only on their pre-produced enzymes that were obtained through ingestion.

95 In addition to a role of an active, soil-derived, gut microbiome for host nutrition, it is possible  
96 that the earthworm microbiome is also vital for other purposes. For example, many studies  
97 have suggested that gut microbiomes of various hosts such as humans, *Drosophila*  
98 *melanogaster* (fruit fly), *Riptortus pedestris* (bean bug) and termites, play essential roles in  
99 different physiological processes. This includes immunity [24–27], reproduction [28], and  
100 resistance to pesticide-induced stress [29]. The earthworm gut microbiome, and indeed the  
101 microbiome associated with the other organs (such as skin and the nephridia), may confer  
102 additional functions that extend beyond roles in digestion and provision of nutrients to the  
103 host such as functions that affect host sexual maturity and reproduction [30,31].

104 Despite the uncertainties regarding the role of the earthworm microbiome in providing  
105 nutritional and non-nutritional benefits to the host, comprehensive studies on this topic, and  
106 on the role played by the earthworm host-microbiome interaction for ecosystem processes,  
107 are lacking. These uncertainties are due to our inability to separate the contribution of  
108 ingested and ‘native’ microbes to host processes. Therefore, we need a method to eliminate  
109 the role played by the ‘native’ microbiome to allow the understanding of the contributions of  
110 the host, the microbiome (and their interactions) to functional effects.

111 Previous studies have attempted to produce axenic earthworm cultures through the passage of  
112 individual animals via sterile solutions or suspensions containing antibiotics, both single  
113 antibiotics and cocktail of antibiotics [32,33]. These studies used *E. fetida* as the ‘model’  
114 organism; presumably because it can easily be reared on a variety of organic substrates [34]  
115 using standard protocols [35]. However, *E. fetida* is not a typical soil dwelling earthworm  
116 species [35], preferring organic-rich habitats. Hence to understand microbiome effects, there

117 is a need to extend studies to other species of earthworm occupying different niches within  
118 the soil.

119 In this present study, we developed and evaluated an antibiotic-based procedure for  
120 producing axenic specimens of earthworms belonging to the epi- anecic (*L. terrestris*) and  
121 epi-endo-anecic (*A. chlorotica*) ecological groupings as well as *E. fetida* as a comparatively  
122 well-studied comparison. The study, thus, provides a first step towards understanding the  
123 importance of the earthworm non-transient microbiome for earthworm health and ecological  
124 functional roles. We evaluated the effects of antifungal and anti-bacterial antibiotic  
125 treatments (individually and in a cocktail) on culturable earthworm-associated microbial  
126 numbers. To further understand how antibiotic exposure influenced the *L. terrestris*-  
127 associated culturable bacterial diversity, we used 16S rDNA amplicon sequencing. This  
128 provided insights into the taxa specific changes associated with specific treatment  
129 knockdowns.

## 130 **2. Material and methods**

### 131 *2.1 Earthworm collection and culture*

132 *E. fetida* and *L. terrestris* were purchased from Worms Direct (Essex, UK). *A. chlorotica*  
133 specimens were collected from the University of Reading dairy farm at Shinfield (grid  
134 reference 51.408580, -0.927353) by hand sorting for adult *A. chlorotica*, identified using the  
135 guide of Sherlock [36]. Identified earthworms were washed with autoclaved de-ionised water  
136 before transport back to the laboratory in a cool box. Each earthworm species was acclimated  
137 to laboratory conditions in the dark at  $20 \pm 2$  °C for two weeks [37,38] prior to the start of the  
138 experiment in a culture made from Kettering loam and Irish moss peat (2:1 ratio) [39] and  
139 the earthworms were fed Irish moss peat at approximately  $1 \text{ g earthworm}^{-1} \text{ week}^{-1}$  after one  
140 week of acclimation [38].

141

## 142 2.2 Antibiotic exposure

143 The adult earthworm individuals selected for antibiotic exposure were responsive to stimuli  
144 and visibly healthy. Selected individuals were of similar sizes (within the same species) to  
145 avoid the potential for size-specific effects. Following initial depuration (48 h on moist filter  
146 paper in the dark), single earthworm specimens were incubated in Duran bottles of either 250  
147 ml (*E. fetida* and *A. chlorotica*) or 500 ml (*L. terrestris*) in volume, containing either 50 ml  
148 (*E. fetida* and *A. chlorotica*) or 150 ml (*L. terrestris*) of sterile 0.65 % (m/v) technical agar  
149 medium (Fisher Scientific, UK). The technical agar concentration used resulted in a medium  
150 that, as determined in a preliminary experiment, was of a consistency that allowed the  
151 earthworms to burrow within the agar. The agar volume ensured that there was an agar depth  
152 of at least 10 cm, as this was found to be a suitable depth, especially for the anecic  
153 earthworms, to form vertical burrows [40]. The agar medium was supplemented with  
154 antibiotics (Sigma-Aldrich) added individually or as a cocktail of the five antibiotics in the  
155 concentrations shown in Table 1. The concentration of each antibiotic in the cocktail was the  
156 same as the concentration used when a single antibiotic was applied. Hence when combined  
157 this treatment provides both a more complex and greater total antibiotic exposure treatment.  
158 The antibiotics were chosen to represent different classes based on mechanism of action [41].  
159 Antibiotics that were not purchased as already-made solutions but in solid form were  
160 dissolved in either 0.1 M hydrochloric acid (ciprofloxacin) or distilled water (nalidixic acid)  
161 as required to make up stock solutions.

162 For each earthworm species, triplicate samples for each antibiotic treatment were incubated at  
163  $20 \pm 2$  °C in darkness for 96 hours following earthworm addition. Control samples with  
164 technical agar but without antibiotics added were included (n = 3). The bottles were covered

165 with aluminium foil to prevent earthworm escape, with pin holes in the cover to ensure  
166 aeration.

167

---

168 ***Table 1***

---

169

170 *2.3 Assessment of the abundance and diversity of earthworm-associated culturable*  
171 *microorganisms*

172 *2.3.1 Microbial abundance*

173 After 96-hours of antibiotic exposure, the earthworms were removed from the agar medium  
174 with sterile tweezers. No earthworm mortality was recorded during the incubation period and  
175 all earthworms had burrowed and were responsive to a physical stimulus. Following removal  
176 from the antibiotic medium, earthworms were washed with autoclaved de-ionised water and  
177 placed in 10 ml sterile centrifuge tubes. Earthworms were euthanised when placed in a 4°C  
178 cold room for 1 hr and then crushed using sterile glass rods. One ml of autoclaved de-ionised  
179 water was added to the tube, followed by vigorous shaking (250-rev min<sup>-1</sup> for 2 min). The  
180 resulting suspension was serially diluted in triplicate with autoclaved de-ionised water in a  
181 ten-fold dilution series (10<sup>0</sup>, 10<sup>-1</sup>, 10<sup>-2</sup>, 10<sup>-3</sup>, 10<sup>-4</sup>, 10<sup>-5</sup>, 10<sup>-6</sup>, 10<sup>-7</sup> and 10<sup>-8</sup>). To determine the  
182 number of colony-forming units (CFUs) of culturable earthworm-associated microorganisms,  
183 20 µl (*E. fetida* and *A. chlorotica*) or 200 µl (*L. terrestris*) of the dilutions were plated on to  
184 agar plates following [42] or using the spread plate method, respectively. Nutrient agar (NA),  
185 that predominantly favours bacterial growth, and potato dextrose agar (PDA), normally used  
186 for culturing fungi, were the agar media used. The agar plates were incubated in the dark at  
187 26 °C under oxic conditions. The emerging colonies were observed after 24 hrs and then at  
188 two weeks when the colonies were counted. The limit of detection of the plate count method  
189 was determined using the volume plated and the dilution factor [43].



190

191 2.3.2 DNA Extraction, 16S-rDNA sequencing

192 Out of the three earthworm species studied, *L. terrestris* (as the only species that had CFUs  
193 above detection limits for all antibiotic treatments and both agars) was carried forward for  
194 DNA-based analysis of associated microorganisms that were cultured on plates arising from  
195 the dilution spread plate estimation of microbial abundance.

196 For each antibiotic treatment, earthworm individual and agar type, colonies growing across  
197 all dilutions were harvested using a sterilised cell scraper. Harvested cells from each plate  
198 were initially suspended in 1 ml sterile de-ionised water in a 2 ml centrifuge tube and then the  
199 different dilutions of the same replicates were pooled and stored at -20 °C prior to DNA  
200 extraction.

201 Total genomic DNA was extracted from the samples using DNeasy Ultraclean Microbial Kit  
202 (Qiagen) according to the manufacturer's protocol. The quality and concentration of the  
203 extracted DNA sample was measured using a NanoDrop spectrophotometer (ND-  
204 2000/2000c, NanoDrop Technologies).

205 A ~550 bp fragment of the V3-V4 hypervariable region of the bacterial 16S-rRNA gene was  
206 amplified by PCR with 5'-CCTACGGGAGGCAGCAG-3' as the forward primer and 5'-  
207 GGACTACHVGGGTWTCTAAT-3' as the reverse primer. Each reaction was done in a 50  
208 µl reaction using four ng of genomic DNA. Each sample was dual index barcoded following  
209 [44]. The amplification thermal cycling consisted of an initial denaturing step at 95 °C for 2  
210 minutes, followed by 30 cycles of denaturation at 95 °C for 30 seconds, annealing at 55 °C  
211 for 15 seconds and extension at 72 °C for 40 seconds, with a final extension step at 72 °C for  
212 10 minutes. All PCR reactions were performed using Q5® High-Fidelity DNA Polymerase  
213 (New England BioLabs, USA). Quality and verification of fragment size was performed

214 using gel electrophoresis. Samples were normalised using a SequalPrep Normalisation Plate  
215 Kit (Thermo Fisher Scientific, UK) and subsequently pooled. The pooled samples were  
216 subsequently run on a 1.2% agarose gel and a ~550 bp fragment was gel extracted using a  
217 QIAquick Gel Extraction Kit (Qiagen, the Netherlands). The gel extracted samples were  
218 quantified using a Qubit HS DNA Kit (Thermo Fisher Scientific, USA) and diluted to 7 pM  
219 using HT buffer. The final library was the run with 10% PhiX using a MiSeq Reagent Kit v3  
220 (600 cycles) on a MiSeq (Illumina, USA). Nucleotide sequence data have been submitted to  
221 NCBI and are available under submission number SUB9306713 as part of bioproject ID  
222 PRJNA715719.

223

#### 224 *2.4 Statistical and bioinformatics analyses*

225 The effect of antibiotic treatment on the number of CFUs for each earthworm species (*E.*  
226 *fetida*, *A. chlorotica*, and *L. terrestris*) was assessed using one-way analysis of variance  
227 (ANOVA) followed by post hoc Tukey comparisons, where appropriate ( $P < 0.05$ ). Normality  
228 of residuals (Anderson-Darling test) and equal variance (Levine's test) assumptions were  
229 verified, and data was square root transformed where required. All analyses for the plate  
230 count data were performed with Minitab 19.1.1.

231 MiSeq reads were demultiplexed using BaseSpace (Illumina, USA). Amplicon sequence  
232 variant (ASV) tables were generated using the DADA2 pipeline [45]. Briefly, in this  
233 procedure, the forward and the reverse reads were inspected for quality. The quality of the  
234 reverse reads was below 30 from 200 bases onwards. This prevented sufficient merging of  
235 the forward and reversed reads, and hence only the forward reads were used in further  
236 analysis. The last ten bases of the forward reads were trimmed, and trimmed reads were  
237 subsequently filtered applying a maxN, maxEE and truncQ value of 0, 2 and 2, respectively.

238 After sample inference, reads were subjected to chimera removal. Filtering of low-quality  
239 reads and removal of chimera lead to removal of on average 18% of the forward reads per  
240 sample. Taxonomy was assigned using the Silva version 132 dataset [46].

241 ASVs assigned to eukaryotes, archaea, chloroplasts, and mitochondria or to an unknown  
242 phylum or kingdom were removed from the dataset.

243 All statistical analyses of ASVs data and data visualisations were performed in R v.3.6.3 [47].  
244 The diversity analysis was carried out using the packages ‘phyloseq’ (McMurdie and  
245 Holmes, 2013) and ‘vegan’ [48]. Observed and Chao1 richness and phylogenetic diversity  
246 measures were used to estimate the alpha diversity. The normality of the dataset was checked  
247 using Shapiro-Wilk normality test and the significance of differences between alpha diversity  
248 and relative abundance of taxa was evaluated using analysis of variance (ANOVA). For the  
249 beta diversity, the principal coordinate analysis (PCoA) based on Jaccard distances that  
250 focuses on unique features, regardless of abundance was used to visualise the similarity of  
251 individual replicates based on the presence and absence of ASVs. The effect of antibiotic  
252 treatment on bacterial community patterns were further analysed by permutation analysis of  
253 variance (PERMANOVA) based on Jaccard distances with the Adonis function (999  
254 permutations) of the ‘vegan’ package. The effect of antibiotic treatment on bacterial  
255 community patterns was also examined using ANOSIM. ‘VennDiagram’ was used to  
256 construct a logical visualisation of relationships between the bacterial genera present in the  
257 antibiotic treatments [49].

258

### 259 **3. Results**

#### 260 *3.1 Effect of antibiotic treatment on earthworm-associated culturable microbial abundance*

261 The aim was to develop and evaluate an antibiotic-based procedure to eradicate earthworm-  
262 associated microorganisms and create axenic earthworms, as far as could be verified using  
263 culture-based methods. For the NA plates (Figure 1a, c, e), ANOVA revealed an overall  
264 significant effect of antibiotic treatments on the number of colonies forming for *E. fetida* ( $P <$   
265  $0.001$ ), *A. chlorotica* ( $P < 0.001$ ) and *L. terrestris* ( $P < 0.001$ ). The post hoc Tukey test  
266 showed that, when comparing the effect of the individual antibiotic treatments on earthworm-  
267 associated microbial abundance across all three earthworm species, cycloheximide and  
268 ampicillin had no significant effect on colony formation compared to the non-antibiotic-  
269 amended control. All other antibiotic treatments, however, did significantly reduce the  
270 microbial burden for at least one earthworm species. The cocktail treatment was the most  
271 effective with CFUs on NA reduced to below the limit of detection ( $<50$  CFU/worm) for *E.*  
272 *fetida* and *A. chlorotica* and by more than 2 orders of magnitude for *L. terrestris*. Although  
273 the cocktail of antibiotics resulted in the lowest number CFUs, it did not result in a  
274 statistically significant different number of CFUs when compared to the ciprofloxacin-only  
275 treatment in *E. fetida* and *A. chlorotica* (PDA), although this difference between the cocktail  
276 and ciprofloxacin-only treatment was significant for *L. terrestris*.

277 For the PDA plates (Figure 1 b, d, f), ANOVA indicated a significant effect of antibiotic  
278 treatment on the number of CFUs for *E. fetida* ( $P < 0.001$ ), *A. chlorotica* ( $P < 0.001$ ), and *L.*  
279 *terrestris* ( $P < 0.011$ ). Post hoc Tukey test indicated that it was only the cocktail treatment  
280 that reduced CFUs compared to control consistently across species. CFU numbers for the  
281 cocktail were, however, not statistically different when compared to ciprofloxacin,  
282 gentamycin, and (for *E. fetida* and *L. terrestris*) nalidixic acid treatments.

---

283

284 Figure 1

285

---

286 3.2 Effect of antibiotic treatment on *L. terrestris*-associated culturable microbial diversity

287 3.2.1 16S rDNA amplicon sequencing

288 Illumina 16S rDNA amplicon sequencing of DNA extracted from colony forming units

289 harvested from NA and PDA dilution series plates from *L. terrestris* generated 1044826 high

290 quality forward reads with an average of 24965 reads per sample. In total 524 ASVs were

291 identified with an average of 31.5 ASVs per sample. Taxonomy was assigned using Silva

292 database version 132 which resulted in the detected bacteria being classed into 10 phyla, 17

293 classes, 45 orders, 71 families and 143 genera.

294

295 3.2.2 Alpha diversity

296 The observed and estimated (Chao1) ASV richness between individual earthworm replicates

297 had a large variation for control (e.g., for Chao1, the coefficient of variation was 82.31 % for

298 NA plates and 39.5% for PDA plates) and some antibiotic-amended treatments (Figure 2a-d).

299 Against this variable background, one way ANOVA revealed that these alpha diversity

300 measures were not significantly influenced by antibiotic treatment ( $P > 0.05$ ; Figure 2a-d).

301 Similarly, there was no overall effect of antibiotic treatment on Faith's phylogenetic diversity

302 ( $P > 0.05$ ; Figure 2e, f).

---

303

304 Figure 2

---

305

306

307 3.2.3 Beta diversity

308 PCoA based on Jaccard distances was used to visualise the similarity in the data from  
309 bacterial community composition for earthworm samples subjected to the different antibiotic  
310 treatments (Figure 3). For bacterial communities culturable on NA, the non-antibiotic-treated  
311 control samples overlapped with those in the ampicillin- and cycloheximide- treated samples.  
312 These clusters appeared distinct from other antibiotic treatment clusters (Figure 3; NA). The  
313 PERMANOVA analysis ( $P = 0.037$ ; [Adonis]) and weakly, the ANOSIM analysis ( $P =$   
314  $0.053$ ) supported that the NA-culturable earthworm microbial communities were significantly  
315 affected by the antibiotic treatments. The data from the PDA-cultured bacterial community  
316 (Figure 3: PDA), also showed that communities from control, ampicillin- and cycloheximide-  
317 treated earthworms clustered together and were separated from the clusters of bacterial  
318 communities from earthworms treated with nalidixic acid, ciprofloxacin, gentamicin, and  
319 cocktail. Both PERMANOVA ( $P = 0.024$ ) and ANOSIM analysis ( $P = 0.009$ ) revealed an  
320 overall significant difference between treatment groups. However, for both NA and PDA it is  
321 notable that, with few exceptions (ampicillin and control for PDA), individual within-  
322 treatment replicates did not group closely together within the ordination space.

---

323 Figure 3

---

324

#### 325 3.2.4 Cultivable shared and unique genera of *L. terrestris* individuals

326 Given the variability in both alpha and beta diversity at the individual earthworm level  
327 (Figure 2; Figure 3), Venn diagrams were used to visualise genera that were unique or  
328 common to more than one earthworm individual within the same treatment, with a focus on  
329 the non-antibiotic-treated control [to understand the initial variability in the culturable  
330 earthworm microbiome (Figure 4a, b)] and the cocktail-treated (Figure 4c, d) earthworm  
331 individuals [as the treatment that most significantly impacted culturable *L. terrestris*-

332 associated microbial abundance (Figure 1e, f)]. For nutrient agar, one genera (*Lelliottia*), was  
333 consistently detected across control earthworm individuals (Figure 4a). Whilst *Lelliottia*  
334 could still be detected in 2 out of 3 cocktail-treated individuals (Figure 4c), two other genera,  
335 *Aeromonas* and *Pseudochrobactrum*, were core in cocktail-treated individuals (Figure 4c).  
336 Whilst *Aeromonas* was present in the microbiome of two of the NA controls (Figure 4a) (and  
337 in all individuals for both control and cocktail treatments for PDA, Figure 4b, d),  
338 *Pseudochrobactrum* was not present in any other situation. In addition to *Aeromonas*, 7 other  
339 genera were core to control earthworm individuals on PDA (Figure 4b). Out of these,  
340 *Pseudomonas*, *Raoultella* and *Verminephrobacter* were still detected in two of the individuals  
341 treated with the antibiotic cocktail (Figure 4d). However, *Comomonas*, *Kosakonia*,  
342 *Pedobacter* and *Sphingobacterium* could not be detected in cocktail PDA plates (Figure 4d),  
343 and, except for *Pedobacter*, were similarly not present in the cocktail treatment for NA plates  
344 when they were detected in at least one NA control individual (Figure 4a, c).

---

345 Figure 4

---

346

#### 347 **4. Discussion**

348

349 Earthworms are key soil organisms contributing to ecosystems processes and associated  
350 services [50]. It is recognised that earthworms harbour an abundant and diverse microbiome  
351 [51]. However, there are considerable uncertainties regarding the role of the earthworm  
352 microbiome in providing nutritional and non-nutritional benefits to the host and the  
353 consequences of the earthworm host-microbiome interaction for ecosystem processes such as  
354 OM decomposition. In this study we investigated the potential of antibiotics to create axenic  
355 earthworms for subsequent use in experiments aiming to improve our understanding of the

356 role that the earthworm microbiome plays in host health and function. Previous studies have  
357 been carried out to produce axenic earthworms in *Eisenia fetida* [32,33]. However, the  
358 applicability of this method to species that can be considered more typical soil inhabitants  
359 was uncertain. Accordingly, here we extend the previous studies to consider species  
360 representing different earthworm ecotypes covering epi-anecic (*L. terrestris*) and epi-endo-  
361 anecic ('intermediate'; *A. chlorotica*) ecological groups (according to Bottinelli et al.'s [6] re-  
362 classification).

363

364 As well as examining the impact of the various antibiotic treatments on the earthworm-  
365 associated microbial abundance, we additionally report on the diversity (richness) and  
366 composition of the culturable microbiome of *L. terrestris* and its response to antibiotic  
367 treatment.

368

369 Overall, we have shown that it is possible to significantly reduce the abundance of  
370 earthworm-associated culturable microorganisms through the treatment of earthworm  
371 individuals with antibiotics or antibiotic cocktail. Our approach is suitable for use in *E. fetida*  
372 and the soil dwelling species *L. terrestris* and *A. chlorotica*. However, the efficacy of  
373 antibiotic treatment depended upon the antibiotic(s) used, the earthworm species, and the agar  
374 medium used for microbial enumeration. In relation to the agar medium, we noted that  
375 colonies forming on PDA, like those for NA, were small and smooth resembling bacterial  
376 growth. Although PDA is associated with the cultivation of fungi (not bacteria), the  
377 composition of the medium (potato extract, glucose) does not select against bacterial growth.  
378 It contains glucose as a readily utilised C source. Given this colony appearance and also the  
379 observation that CFU abundance on PDA was not affected by the antifungal cycloheximide  
380 treatment (Figure 1), we assumed that colonies forming on PDA were bacterial.



381

382 Only the cocktail of five antibiotics (ampicillin, ciprofloxacin, cycloheximide, gentamicin  
383 and nalidixic acid) resulted in culturable numbers significantly lower than the control for both  
384 NA and PDA agar across all earthworm species (Figure 1), whilst ampicillin and  
385 cycloheximide mostly showed no significant differences when compared to the control.  
386 Resistance to ampicillin, a beta-lactam antibiotic, is known to be naturally prevalent among  
387 soil bacteria [52,53], and cycloheximide, an antifungal, is expected not to be effective on  
388 most bacteria [54].

389

390 It was possible, however, through the treatment of *E. fetida* (NA) and *A. chlorotica* with the  
391 antibiotic cocktail to reduce the abundance of earthworm-associated microorganisms from  $\geq$   
392  $10^5$  CFU per earthworm individual to below the limit of detection (50 CFU/ earthworm in our  
393 study). This agrees with previous studies [32,33] that have also applied antibiotics to create  
394 earthworms (*E. fetida*) deemed ‘axenic’ with no associated microorganisms detectable by  
395 culture.

396

397 Whilst the application of the antibiotic cocktail [and ciprofloxacin applied singly for *E. fetida*  
398 (PDA)] reduced culturable microbial abundance to below detection in *E. fetida* and *A.*  
399 *chlorotica*, microbial numbers were not reduced to below detection limits for *L. terrestris*,  
400 although a significant >100-fold knockdown was recorded in this species for the cocktail. To  
401 be exposed to antibiotics, through both dermal and gut contact, earthworm individuals needed  
402 to burrow and ingest agar. Differences in burrowing behaviour between species may  
403 influence the degree to which earthworms are exposed to antibiotics, and therefore the  
404 effectiveness of the antibiotic treatment. Also, there may also be different exposure levels in  
405 different bacterial populations. Bacteria in the gut are likely to receive a high dose, whereas

406 the nephridial symbionts may be more ‘protected’ against antibiotics due to their embedment  
407 in an organ that may be more ‘sealed’ from antibiotics. *L. terrestris*’s natural behaviour is to  
408 create permanent vertical burrows, travelling to the surface to feed on partially decomposed  
409 plant litters and other organic matters [55,56]. Although we scaled up agar volumes to  
410 accommodate the larger *L. terrestris* size and burrowing behaviour, it is possible that *L.*  
411 *terrestris* individuals did not explore and ingest the antibiotic-containing agar to the same  
412 extent, resulting in reduced exposure. Alternatively, the *L. terrestris* microbiome may  
413 harbour a larger number of culturable antibiotic-resistant microorganisms [57,58].

414 Earthworms are known to produce their own antimicrobial agents [57] which might lead to  
415 earthworm species-specific selection of antibiotic resistance traits within the microbiome.

416

417 Although based on methods of Hand & Hayes[32] and Whiston and Seal [33], our approach  
418 differed from previously published work in terms of the spectrum of antibiotics applied.

419 Nalidixic acid, gentamicin, a penicillin (ampicillin) and cycloheximide [33] or cycloheximide

420 [32] were in common with the previous studies, but, additionally ciprofloxacin (a

421 fluoroquinolone) was included as an antimicrobial not tested previously. In most cases

422 ciprofloxacin, when applied alone, was just as effective in reducing culturable numbers as the

423 cocktail treatment. This effectiveness may be related to its broad-spectrum DNA gyrase

424 inhibitory activity against both Gram-negative and Gram-positive bacteria [59]. Nalidixic

425 acid similarly inhibits bacterial DNA gyrase [60,61] whereas gentamicin has a different mode

426 of action making it effective only towards Gram-negative bacteria [62].

427

428 As well as differences in the choice of antibiotics used, our method also varied from

429 previously published work in terms of the methodology and duration of antibiotic exposure.

430 We used sterile semi-solid technical agar as the ‘carrier’ for antibiotic exposure. In contrast,

431 previous studies used aqueous solutions [32] or sterile suspensions of microcrystalline  
432 cellulose [33] . Our exposure period (4 days) was comparable to that employed by Whiston  
433 and Seal [33] (5 days), but shorter than the 35 days adopted by Hand and Hayes [32] and  
434 consisted of a single exposure step as opposed to one [33] or several [32] transfers of  
435 earthworm individuals between different antibiotic-containing media. Reducing the timescale  
436 of exposure and the degree of earthworm handling reduces the risk of earthworm mortality  
437 and ensures that an earthworm goes forwards in an unstressed state into further experiments.  
438 In our trial, all earthworm specimens survived after the exposure to the antibiotic when using  
439 response to touch stimuli as a superficial measurement of health condition.

440

441 For *L. terrestris*, 16S rDNA amplicon sequencing of the NA- and PDA- grown bacterial  
442 communities was applied to characterise the richness and composition of the culturable  
443 microbiome of *L. terrestris* and its response to antibiotic treatment. For reasons previously  
444 discussed, PDA-grown colonies were assumed to be bacterial and were included in the 16S  
445 rDNA-based sequencing effort. This enabled the characterisation of potentially different, agar  
446 specific, microbiomes due to the selective nature of bacterial growth [63].

447

448 Whilst cognisant that the bacteria that can be cultured on laboratory media are only a very  
449 small proportion of the total diversity and therefore that we have not captured what might be  
450 a significant non-culturable fraction [64], we focussed on culturable microbiomes (i.e.,  
451 amplicon sequencing from colony-extracted DNA). This was because we were concerned that  
452 amplification of microbial DNA directly extracted from earthworm tissues would not be able  
453 to distinguish between DNA from living microbial cells surviving the biocidal treatments and  
454 those that had been recently killed [65]. Amplification of DNA from dead microorganisms  
455 would undermine the identification of bacterial taxa that escaped the effect of the antibiotic

456 treatment. Since this culture-based approach will mean that the relative abundance of a given  
457 ASV in a sample will depend not only on the original cell abundance in the earthworm  
458 sample but also confounded by the subsequent rate of multiplication on agar, the subsequent  
459 analysis of diversity and taxonomic composition was based on presence/absence, not relative  
460 abundance.

461

462 Comparison of estimated Chao1 ASV richness and Observed richness suggested that the  
463 sequencing depth covered the richness of ASVs present. However, there was substantial  
464 within-treatment variation in ASV richness, including for the non-antibiotic-treated controls.  
465 Due to the destructive nature of sampling, it was not possible to examine the impact of  
466 antibiotic treatment on the microbiome for a given earthworm individual (i.e., before and  
467 after treatment). That there was no significant effect of antibiotic treatment on either ASV  
468 richness (Observed and Chao1) or phylogenetic richness, even for antibiotic treatments that  
469 significantly reduced the number of culturable bacteria (Cocktail (NA & PDA) and  
470 ciprofloxacin (NA); Figure 1), might be partly due to initial variability in bacterial richness  
471 between earthworm individuals (Figure 1) going into the incubation. This variability is in  
472 agreement with other reports of high variability in host-associated microbiomes [66–68].  
473 When compared to other studies on earthworm-associated bacterial richness [67–69], our  
474 analysis revealed a low number of ASVs per worm (e.g., ~30 ASVs for the NA control).  
475 However, this is expected due to the focus on only those bacteria that formed colonies on the  
476 NA and PDA medium. In addition, the *L. terrestris* individuals in the current trial were  
477 depurated before the plating of earthworm samples. This means that the culturable  
478 microbiome in our study was likely not dominated by diverse transient microbes associated  
479 with the ingested loam: peat substrate but those more tightly-associated with the gut and other  
480 organs [68].

481

482 Whilst there was no significant impact on the richness of ASVs, PERMANOVA and  
483 ANOSIM analysis suggested an impact of antibiotic treatment on community composition.  
484 The PCoA (Figure 3) highlighted the variability between within-treatment replicates but  
485 suggested that the bacterial community compositions for the antibiotic treatments (cocktail,  
486 ciprofloxacin) that caused the most significant reduction in culturable abundance (Figure 1)  
487 were among the most dissimilar to the control.

488

489 Genera common to more than one earthworm individual within the same treatment were  
490 visualized by Venn diagrams (Figure 4) to identify core members of the culturable  
491 microbiome and those genera sensitive or tolerant to antibiotic treatment. The core bacterial  
492 diversity (phyla level) of the *L. terrestris* culturable microbiome composed of members of the  
493 *Proteobacteria* (*Aeromonas*, *Comomonas*, *Kosakonia*, *Lelliottia*, *Pseudomonas*, *Raoultella*,  
494 *Verminephrobacter* spp.) and *Bacteroidetes* (*Pedobacter*, *Sphingobacterium* spp.). This  
495 composition is in broad agreement with the earthworm-associated phyla described in other  
496 earthworm microbiome studies [70–72]. In particular, members of the genus  
497 *Verminephrobacter* are known symbionts found in Lumbricid earthworms and have a known  
498 nephridial association [31,73,74]. *Aeromonas*, a genus consisting of facultative anaerobic  
499 species, are a further taxa that are frequently earthworm- associated including with *L.*  
500 *terrestris* [75,76].

501

502 Among taxa indicating potential resistance, the near ubiquitous detection of *Aeromonas* in the  
503 culturable microbiome of both control and antibiotic cocktail treated individuals suggests that  
504 representatives of this genus were resistant to antibiotic treatment. *Aeromonas* are considered  
505 to be naturally resistant to  $\beta$ -lactam antibiotics, such as ampicillin [77,78] and resistance to

506 ciprofloxacin and nalidixic acid has also been reported for environmental strains, including  
507 multi-antibiotic resistance [78]. In contrast, resistance of this genera to gentamicin appears to  
508 be rare [78,79]. Further characterization of the antibiotic resistance profile of our *Aeromonas*  
509 isolates would be required to discern if these strains were indeed gentamicin resistant as may  
510 be suggested by their presence in the cocktail exposure or, alternatively, evaded exposure.  
511 *Aeromonas hydrophila* has been isolated from the coelomic cavity of *L. terrestris* [80]. If  
512 *Aeromonas* were in this compartment, their exposure may be more limited than for bacteria in  
513 the gut. The organ-specific location of *Verminephrobacter* may similarly result in a lower  
514 exposure for members of this genus.

515

516 In contrast to the apparent tolerance of *Aeromonas* species to the antibiotic exposure, bacteria  
517 belonging to the genera *Comomonas*, *Kosakonia* and *Sphingobacterium* that were part of the  
518 core in control *L. terrestris* were not detected in cocktail-treated individuals. This absence  
519 suggests a possible antibiotic sensitivity of these strains. No antibiotic resistance genes have  
520 been annotated in environmental isolates of *Comamonas* [81] and we could not find reports  
521 of resistance traits in environmental *Kosakonia* and *Sphingobacterium* strains. The genus  
522 *Pseudochrobactrum*, however, was not detected in control individuals but was present in all  
523 cocktail-treated individuals (NA) suggesting that antibiotic treatment potentially promoted  
524 the growth of this putatively multi-antibiotic resistant group to densities above the limit of  
525 detection of the spread plate. We could not find any previous descriptions of the resistance of  
526 *Pseudochrobactrum* to the antibiotics used here. Further characterization is required to verify  
527 the antibiotic resistance profile of this group and to explore the earthworm as a microbial  
528 environment conducive to acquisition of antibiotic resistance genes, particularly under the  
529 pressure of antibiotic selection [82].

530

531 *4.1 Conclusion*

532 We have shown that is it possible, across three ecologically-contrasting earthworm species  
533 (*E. fetida*, *L. terrestris*, *A. chlorotica*), to significantly reduce the abundance of earthworm-  
534 associated culturable microorganisms through a 96 h exposure of earthworm individuals to a  
535 cocktail of antibiotics containing cycloheximide (150 µg ml<sup>-1</sup>), ampicillin (100 µg ml<sup>-1</sup>),  
536 ciprofloxacin (50 µg ml<sup>-1</sup>), nalidixic acid (50 µg ml<sup>-1</sup>), and gentamicin (50 µg ml<sup>-1</sup>) in a semi-  
537 solid agar carrier. Abundance was reduced to below detection limits (50 CFU individual<sup>-1</sup>) in  
538 *E. fetida* and *A. chlorotica* and by >100-fold for *L. terrestris* with accompanying shifts in *L.*  
539 *terrestris* bacterial community composition. The culturable bacterial microbiome of control  
540 (non-exposed) and antibiotic cocktail-exposed *L. terrestris* individuals revealed between-  
541 individual variability in richness and diversity but also ‘core’ genera that were putatively  
542 sensitive (*Comomonas*, *Kosakonia* and *Sphingobacterium*) or resisted (*Aeromonas*,  
543 *Pseudochrobactrum*) antibiotic exposure. This characterization of the efficacy of antibiotic  
544 treatment in creating ‘axenic’ *E. fetida* and *A. chlorotica* individuals or *L. terrestris* with a  
545 suppressed microbial composition provides the foundation for future experiments aimed at  
546 understanding the importance of earthworm-associated microorganisms, be they transient gut  
547 inhabitants or more permanently-associated, for host health and ecosystem functioning.

548

549

550 **5. References**

551 [1] J.P. Curry, Grassland Invertebrates: Ecology, Influence on Soil Fertility and Effects  
552 on Plant Growth, Chapman & Hall, London, 1994.

553 [2] K.E. Lee, Earthworms: their ecology and relationships with soils and land use.,  
554 Academic Press Inc., London, 1985.

555 [3] G. Brown, I. Barois, P. Lavelle, Regulation of soil organic matter dynamics and  
556 microbial activity in the drilosphere and the role of interactions with other edaphic

- 557 functional domains, *European Journal of Soil Biology*. 36 (2000) 177–198.  
558 [https://doi.org/10.1016/S1164-5563\(00\)01062-1](https://doi.org/10.1016/S1164-5563(00)01062-1).
- 559 [4] M.B. Bouché, *Strategies lombriciennes*, *Ecol. Bull. (Stockholm)*. 25 (1977) 122–132.
- 560 [5] D. Thakuria, O. Schmidt, D. Finan, D. Egan, F.M. Doohan, Gut wall bacteria of  
561 earthworms: A natural selection process, *ISME Journal*. 4 (2010) 357–366.  
562 <https://doi.org/10.1038/ismej.2009.124>.
- 563 [6] N. Bottinelli, M. Hedde, P. Jouquet, Y. Capowiez, An explicit definition of  
564 earthworm ecological categories – Marcel Bouché’s triangle revisited, *Geoderma*. 372  
565 (2020) 114361. <https://doi.org/10.1016/j.geoderma.2020.114361>.
- 566 [7] P.J. Bohlen, P.M. Groffman, T.J. Fahey, M.C. Fisk, E. Suárez, D.M. Pelletier, R.T.  
567 Fahey, Ecosystem Consequences of Exotic Earthworm Invasion of North Temperate  
568 Forests, *Ecosystems*. 7 (2004) 1–22. <https://doi.org/10.1007/s10021-003-0126-z>.
- 569 [8] O. Ferlian, N. Eisenhauer, M. Aguirrebengoa, M. Camara, I. Ramirez-Rojas, F.  
570 Santos, K. Tanalgo, M.P. Thakur, Invasive earthworms erode soil biodiversity: A  
571 meta-analysis, *Journal of Animal Ecology*. 87 (2018) 162–172.  
572 <https://doi.org/10.1111/1365-2656.12746>.
- 573 [9] G. Angst, C.W. Mueller, I. Prater, Š. Angst, J. Frouz, V. Jílková, F. Peterse, K.G.J.  
574 Nierop, Earthworms act as biochemical reactors to convert labile plant compounds into  
575 stabilized soil microbial necromass, *Communications Biology*. 2 (2019) 1–7.  
576 <https://doi.org/10.1038/s42003-019-0684-z>.
- 577 [10] H. Bossuyt, J. Six, P.F. Hendrix, Protection of soil carbon by microaggregates within  
578 earthworm casts, *Soil Biology and Biochemistry*. 37 (2005) 251–258.  
579 <https://doi.org/10.1016/j.soilbio.2004.07.035>.
- 580 [11] J.A. van Veen, P.J. Kuikman, Soil structural aspects of decomposition of organic  
581 matter by micro-organisms, *Biogeochemistry*. 11 (1990) 213–233.  
582 <https://doi.org/10.1007/BF00004497>.
- 583 [12] P. Jouquet, J. Dauber, J. Lagerlöf, P. Lavelle, M. Lepage, Soil invertebrates as  
584 ecosystem engineers: Intended and accidental effects on soil and feedback loops,  
585 *Applied Soil Ecology*. 32 (2006) 153–164.  
586 <https://doi.org/10.1016/j.apsoil.2005.07.004>.



- 587 [13] L. Wessels Perelo, M. Jimenez, J.C. Munch, Microbial immobilisation and turnover  
588 of <sup>15</sup>N labelled substrates in two arable soils under field and laboratory conditions,  
589 *Soil Biology and Biochemistry*. 38 (2006) 912–922.  
590 <https://doi.org/10.1016/j.soilbio.2005.07.013>.
- 591 [14] B. Ravindran, S.M. Contreras-Ramos, G. Sekaran, Changes in earthworm gut  
592 associated enzymes and microbial diversity on the treatment of fermented tannery  
593 waste using epigeic earthworm *Eudrilus eugeniae*, *Ecological Engineering*. 74 (2015)  
594 394–401. <https://doi.org/10.1016/j.ecoleng.2014.10.014>.
- 595 [15] P. Lavelle, C. Lattaud, D. Trigo, I. Barois, Mutualism and biodiversity in soils, *Plant*  
596 *and Soil*. 170 (1995) 23–33. <https://doi.org/10.1007/BF02183052>.
- 597 [16] D.S. Jenkinson, *The priming action*, Braunschweig-Volkenrode, 1966.
- 598 [17] Z. Abail, L. Sampedro, J.K. Whalen, Short-term carbon mineralization from  
599 endogeic earthworm casts as influenced by properties of the ingested soil material,  
600 *Applied Soil Ecology*. 116 (2017) 79–86. <https://doi.org/10.1016/j.apsoil.2017.02.022>.
- 601 [18] D.T.T. Hoang, S.L. Bauke, Y. Kuzyakov, J. Pausch, Rolling in the deep: Priming  
602 effects in earthworm biopores in topsoil and subsoil, *Soil Biology and Biochemistry*.  
603 114 (2017) 59–71. <https://doi.org/10.1016/j.soilbio.2017.06.021>.
- 604 [19] M. Nozaki, C. Miura, Y. Tozawa, T. Miura, The contribution of endogenous  
605 cellulase to the cellulose digestion in the gut of earthworm (*Pheretima hilgendorfi*:  
606 *Megascolecidae*), *Soil Biology and Biochemistry*. 41 (2009) 762–769.  
607 <https://doi.org/10.1016/j.soilbio.2009.01.016>.
- 608 [20] K. Fujii, K. Ikeda, S. Yoshida, Isolation and characterization of aerobic  
609 microorganisms with cellulolytic activity in the gut of endogeic earthworms,  
610 *International Microbiology*. 15 (2012) 121–130.  
611 <https://doi.org/10.2436/20.1501.01.165>.
- 612 [21] L.R. Lynd, P.J. Weimer, W.H. van Zyl, I.S. Pretorius, Microbial Cellulose  
613 Utilization: Fundamentals and Biotechnology, *Microbiology and Molecular Biology*  
614 *Reviews*. 66 (2002) 506–577. <https://doi.org/10.1128/mnbr.66.3.506-577.2002>.
- 615 [22] M. Tabatabai, W. Dick, Enzymes in Soil - Research and Developments in Measuring  
616 Activities, in: R. Burns, R. Dick (Eds.), *Enzymes in the Environment- Activity*,

- 617 Ecology, and Applications, Marcel Dekker, Inc., New York and Basel, 2002: pp. 567–  
618 596. <https://doi.org/10.1201/9780203904039.ch21>.
- 619 [23] S.A. Garbuz, N. v Yaroslavtseva, V.A. Kholodov, Enzymatic activity inside and  
620 outside of water-stable aggregates in soils under different land use, *Eurasian Soil*  
621 *Science*. 49 (2016) 367–375. <https://doi.org/10.1134/S1064229316030030>.
- 622 [24] D. Artis, Epithelial-cell recognition of commensal bacteria and maintenance of  
623 immune homeostasis in the gut, *Nature Reviews Immunology*. 8 (2008) 411–420.  
624 <https://doi.org/10.1038/nri2316>.
- 625 [25] C.L. Sansone, J. Cohen, A. Yasunaga, J. Xu, G. Osborn, H. Subramanian, B. Gold,  
626 N. Buchon, S. Cherry, Microbiota-dependent priming of antiviral intestinal immunity  
627 in *Drosophila*, *Cell Host and Microbe*. 18 (2015) 571–581.  
628 <https://doi.org/10.1016/j.chom.2015.10.010>.
- 629 [26] G. Tian, Y. Bi, Z. Sun, L. Zhang, Phenolic acids in the plow layer soil of strawberry  
630 fields and their effects on the occurrence of strawberry anthracnose, *European Journal*  
631 *of Plant Pathology*. 143 (2015) 581–594. <https://doi.org/10.1007/s10658-015-0711-y>.
- 632 [27] Z. Zhang, H. Tang, P. Chen, H. Xie, Y. Tao, Demystifying the manipulation of host  
633 immunity, metabolism, and extraintestinal tumors by the gut microbiome, *Signal*  
634 *Transduction and Targeted Therapy*. 4 (2019). [https://doi.org/10.1038/s41392-019-](https://doi.org/10.1038/s41392-019-0074-5)  
635 [0074-5](https://doi.org/10.1038/s41392-019-0074-5).
- 636 [28] R.B. Rosengaus, C.N. Zecher, K.F. Schultheis, R.M. Brucker, S.R. Bordenstein,  
637 Disruption of the termite gut microbiota and its prolonged consequences for fitness,  
638 *Applied and Environmental Microbiology*. 77 (2011) 4303–4312.  
639 <https://doi.org/10.1128/AEM.01886-10>.
- 640 [29] Y. Kikuchi, M. Hayatsu, T. Hosokawa, A. Nagayama, K. Tago, T. Fukatsu,  
641 Symbiont-mediated insecticide resistance, *Proceedings of the National Academy of*  
642 *Sciences of the United States of America*. 109 (2012) 8618–8622.  
643 <https://doi.org/10.1073/pnas.1200231109>.
- 644 [30] M.B. Lund, S.K. Davidson, M. Holmstrup, S. James, K.U. Kjeldsen, D.A. Stahl, A.  
645 Schramm, Diversity and host specificity of the Verminephrobacter-earthworm

- 646 symbiosis, *Environmental Microbiology*. 12 (2010) 2142–2151.  
647 <https://doi.org/10.1111/j.1462-2920.2009.02084.x>.
- 648 [31] F. Viana, L.C. Paz, K. Methling, C.F. Damgaard, M. Lalk, A. Schramm, M.B. Lund,  
649 Distinct effects of the nephridial symbionts *Verminephrobacter* and *Candidatus*  
650 *Nephrothrix* on reproduction and maturation of its earthworm host *Eisenia andrei*,  
651 *FEMS Microbiology Ecology*. 94 (2018). <https://doi.org/10.1093/femsec/fix178>.
- 652 [32] P. Hand, W.A.A. Hayes, Production of axenic earthworms by antibiotic treatment,  
653 *Soil Biology and Biochemistry*. 19 (1987) 475–477. [https://doi.org/10.1016/0038-](https://doi.org/10.1016/0038-0717(87)90041-1)  
654 [0717\(87\)90041-1](https://doi.org/10.1016/0038-0717(87)90041-1).
- 655 [33] R.A.A. Whiston, K.J.J. Seal, Rapid production of axenic specimens of the earthworm  
656 *Eisenia foetida* using microcrystalline cellulose as a carrier medium for antibiotics,  
657 *Soil Biology and Biochemistry*. 20 (1988) 407–408. [https://doi.org/10.1016/0038-](https://doi.org/10.1016/0038-0717(88)90025-9)  
658 [0717\(88\)90025-9](https://doi.org/10.1016/0038-0717(88)90025-9).
- 659 [34] S. Yasmin, D. D’Souza, Effects of Pesticides on the Growth and Reproduction of  
660 Earthworm: A Review, *Applied and Environmental Soil Science*. 2010 (2010) 1–9.  
661 <https://doi.org/10.1155/2010/678360>.
- 662 [35] ISO, ISO 11268-1:2012 - Soil quality — Effects of pollutants on earthworms — Part  
663 1: Determination of acute toxicity to *Eisenia fetida*/*Eisenia andrei*, (2012).  
664 <https://www.iso.org/standard/53527.html> (accessed October 31, 2019).
- 665 [36] E. Sherlock, Key to the earthworms of the UK and Ireland, 2018.  
666 <https://www.nhbs.com/key-to-the-earthworms-of-the-uk-and-ireland-book> (accessed  
667 April 8, 2020).
- 668 [37] H.-C. Fründ, K. Butt, Y. Capowiez, N. Eisenhauer, C. Emmerling, G. Ernst, M.  
669 Potthoff, M. Schädler, S. Schrader, Using earthworms as model organisms in the  
670 laboratory: Recommendations for experimental implementations, *Pedobiologia*. 53  
671 (2010) 119–125. <https://doi.org/10.1016/J.PEDOBI.2009.07.002>.
- 672 [38] T. Sizmur, E. Martin, K. Wagner, E. Parmentier, C. Watts, A.P. Whitmore, Milled  
673 cereal straw accelerates earthworm (*Lumbricus terrestris*) growth more than selected  
674 organic amendments, *Applied Soil Ecology*. 113 (2017) 166–177.  
675 <https://doi.org/10.1016/j.apsoil.2016.12.006>.

- 676 [39] T. Sizmur, E.L. Tilston, J. Charnock, B. Palumbo-Roe, M.J. Watts, M.E. Hodson,  
677 Impacts of epigeic, anecic and endogeic earthworms on metal and metalloid mobility  
678 and availability, *Journal of Environmental Monitoring*. 13 (2011) 266–273.  
679 <https://doi.org/10.1039/c0em00519c>.
- 680 [40] C.N. Lowe, K.R. Butt, Culture techniques for soil dwelling earthworms: A review,  
681 *Pedobiologia*. 49 (2005) 401–413. <https://doi.org/10.1016/j.pedobi.2005.04.005>.
- 682 [41] G. Kapoor, S. Saigal, A. Elongavan, Action and resistance mechanisms of  
683 antibiotics: A guide for clinicians, *Journal of Anaesthesiology Clinical Pharmacology*.  
684 33 (2017) 300–305. [https://doi.org/10.4103/joacp.JOACP\\_349\\_15](https://doi.org/10.4103/joacp.JOACP_349_15).
- 685 [42] A.A. Miles, S.S. Misra, J.O. Irwin, The estimation of the bactericidal power of the  
686 blood, *Journal of Hygiene*. 38 (1938) 732–749.  
687 <https://doi.org/10.1017/S002217240001158X>.
- 688 [43] S. Sutton, Accuracy of Plate Counts, *Journal of Validation Technology*. Vol. 17  
689 (2011) 42–46. [www.microbiol.org](http://www.microbiol.org) (accessed June 21, 2020).
- 690 [44] J.J. Kozich, S.L. Westcott, N.T. Baxter, S.K. Highlander, P.D. Schloss, Development  
691 of a dual-index sequencing strategy and curation pipeline for analyzing amplicon  
692 sequence data on the miseq illumina sequencing platform, *Applied and Environmental*  
693 *Microbiology*. 79 (2013) 5112–5120. <https://doi.org/10.1128/AEM.01043-13>.
- 694 [45] B.J. Callahan, P.J. McMurdie, M.J. Rosen, A.W. Han, A.J.A. Johnson, S.P. Holmes,  
695 DADA2: High-resolution sample inference from Illumina amplicon data, *Nature*  
696 *Methods*. 13 (2016) 581–583. <https://doi.org/10.1038/nmeth.3869>.
- 697 [46] B. Callahan, Silva taxonomic training data formatted for DADA2 (Silva version  
698 132), Zendo. (2018). <https://doi.org/http://doi.org/10.5281/zenodo.1172783>.
- 699 [47] H. Somanathan, S. Mali, R.M. Borges, L.A. Shilton, J.D. Altringham, S.G.  
700 Compton, R.J. Whittaker, S.E. Russo, C.K. Augspurger, Y. Nakashima, E. Inoue, M.  
701 Inoue-Murayama, J.R. Abd Sukor, K.R. McConkey, S. Prasad, R.T. Corlett, A.  
702 Campos-Arceiz, J.F. Brodie, H. Rogers, L. Santamaria, I. Martínez, D. García, J.R.  
703 Obeso, R.C. Team, D. Mudappa, C.R. Malone, S. Kitamura, T. Yumoto, P. Poonswad,  
704 P. Chuailua, K. Plongmai, T. Maruhashi, N. Noma, A.R. Joshi, J.L.D. Smith, F.J.  
705 Cuthbert, P. Jordano, E.W. Schupp, C. García, J.A. Godoy, J.L. García-Castaño, P.A.

- 706 Jansen, F. Bongers, P.J. van der Meer, H.F. Howe, J. Smallwood, J.M. Gómez, C.  
707 Puerta-Piñero, J.M. v Fragoso, R. Dudley, A. Datta, G.S. Rawat, R: A Language and  
708 Environment for Statistical Computing. R Foundation for Statistical Computing.,  
709 *Oecologia*. 15 (2004) 413–448. <https://doi.org/10.1111/j.1744-7429.2003.tb00280.x>.
- 710 [48] J. Oksanen, F.B. Guillaume, M. Friendly, R. Kindt, D.P. McGlinn, P.R. Minchin,  
711 R.B. O’Hara, G.L. Simpson, P. Solymos, M. Henry, H. Stevens, E. Szoecs, H.  
712 Wagner, *vegan: Community Ecology Package*. R package version 2.4-4, 2018.  
713 [file:///C:/Users/User/Desktop/veganCommunityEcologyPackageversion2.5-](file:///C:/Users/User/Desktop/veganCommunityEcologyPackageversion2.5-3October2018.pdf)  
714 [3October2018.pdf](file:///C:/Users/User/Desktop/veganCommunityEcologyPackageversion2.5-3October2018.pdf).
- 715 [49] Y. Chen, Y. Peng, C.-C. Dai, Q. Ju, Biodegradation of 4-hydroxybenzoic acid by  
716 *Phomopsis liquidambari*, *Applied Soil Ecology*. 51 (2011) 102–110.  
717 <https://doi.org/10.1016/J.APSOIL.2011.09.004>.
- 718 [50] G. Angst, Š. Angst, J. Frouz, F. Peterse, K.G.J. Nierop, Preferential degradation of  
719 leaf- vs. root-derived organic carbon in earthworm-affected soil, *Geoderma*. 372  
720 (2020) 114391. <https://doi.org/10.1016/j.geoderma.2020.114391>.
- 721 [51] R.M. Medina-Sauza, M. Álvarez-Jiménez, A. Delhal, F. Reverchon, M. Blouin, J.A.  
722 Guerrero-Analco, C.R. Cerdán, R. Guevara, L. Villain, I. Barois, Earthworms building  
723 up soil microbiota, a review, *Frontiers in Environmental Science*. 7 (2019) 81.  
724 <https://doi.org/10.3389/fenvs.2019.00081>.
- 725 [52] J. Armalytė, J. Skerniškytė, E. Bakienė, R. Krasauskas, R. Šiugždinienė, V.  
726 Kareivienė, S. Kerzienė, I. Klimienė, E. Sužiedėlienė, M. Ružauskas, Microbial  
727 diversity and antimicrobial resistance profile in microbiota from soils of conventional  
728 and organic farming systems, *Frontiers in Microbiology*. 10 (2019) 892.  
729 <https://doi.org/10.3389/fmicb.2019.00892>.
- 730 [53] S. Demanèche, H. Sanguin, J. Poté, E. Navarro, D. Bernillon, P. Mavingui, W.  
731 Wildi, T.M. Vogel, P. Simonet, Antibiotic-resistant soil bacteria in transgenic plant  
732 fields, *Proceedings of the National Academy of Sciences of the United States of*  
733 *America*. 105 (2008) 3957–3962. <https://doi.org/10.1073/pnas.0800072105>.
- 734 [54] L. Badalucco, F. Pomaré, S. Grego, L. Landi, P. Nannipieri, Activity and  
735 degradation of streptomycin and cycloheximide in soil, *Biology and Fertility of Soils*.  
736 18 (1994) 334–340. <https://doi.org/10.1007/BF00570637>.

- 737 [55] V. Nuutinen, K.R. Butt, Interaction of *Lumbricus terrestris* L. burrows with field  
738 subdrains, in: *Pedobiologia*, Elsevier GmbH, 2003: pp. 578–581.  
739 <https://doi.org/10.1078/0031-4056-00232>.
- 740 [56] L.R. Potvin, E.A. Lilleskov, Introduced earthworm species exhibited unique patterns  
741 of seasonal activity and vertical distribution, and *Lumbricus terrestris* burrows  
742 remained usable for at least 7 years in hardwood and pine stands, *Biology and Fertility*  
743 *of Soils*. 53 (2017) 187–198. <https://doi.org/10.1007/s00374-016-1173-x>.
- 744 [57] Y.G. Zhu, Y. Zhao, D. Zhu, M. Gillings, J. Penuelas, Y.S. Ok, A. Capon, S.  
745 Banwart, Soil biota, antimicrobial resistance and planetary health, *Environment*  
746 *International*. 131 (2019) 105059. <https://doi.org/10.1016/j.envint.2019.105059>.
- 747 [58] W. Li, S. Li, J. Zhong, Z. Zhu, J. Liu, W. Wang, A novel antimicrobial peptide from  
748 skin secretions of the earthworm, *Pheretima guillelmi* (Michaelsen), *Peptides*. 32  
749 (2011) 1146–1150. <https://doi.org/10.1016/j.peptides.2011.04.015>.
- 750 [59] D.M. Campoli-Richards, J.P. Monk, A. Price, P. Benfield, P.A. Todd, A. Ward,  
751 Ciprofloxacin: A Review of its Antibacterial Activity, Pharmacokinetic Properties and  
752 Therapeutic Use, *Drugs*. 35 (1988) 373–447. [https://doi.org/10.2165/00003495-](https://doi.org/10.2165/00003495-198835040-00003)  
753 [198835040-00003](https://doi.org/10.2165/00003495-198835040-00003).
- 754 [60] G.J. Bourguignon, M. Levitt, R. Sternglanz, Studies on the mechanism of action of  
755 nalidixic acid., *Antimicrobial Agents and Chemotherapy*. 4 (1973) 479–486.  
756 <https://doi.org/10.1128/AAC.4.4.479>.
- 757 [61] W.A. Goss, T.M. Cook, Nalidixic Acid—Mode of Action, in: Corcoran J.W., F.E.  
758 Hahn, J.F. Snell, K.L. Arora (Eds.), *Mechanism of Action of Antimicrobial and*  
759 *Antitumor Agents*, Springer Berlin Heidelberg, 1975: pp. 174–196.  
760 [https://doi.org/10.1007/978-3-642-46304-4\\_12](https://doi.org/10.1007/978-3-642-46304-4_12).
- 761 [62] L. Lin, M.C. Wagner, R. Cocklin, A. Kuzma, M. Harrington, B.A. Molitoris, M.G.  
762 Goebel, The antibiotic gentamicin inhibits specific protein trafficking functions of the  
763 arf1/2 family of GTPases, *Antimicrobial Agents and Chemotherapy*. 55 (2011) 246–  
764 254. <https://doi.org/10.1128/AAC.00450-10>.
- 765 [63] M. Bonnet, J.C. Lagier, D. Raoult, S. Khelaifia, Bacterial culture through selective  
766 and non-selective conditions: the evolution of culture media in clinical microbiology,



- 767 New Microbes and New Infections. 34 (2020) 100622.  
768 <https://doi.org/10.1016/j.nmni.2019.100622>.
- 769 [64] F. Walsh, B. Duffy, The Culturable Soil Antibiotic Resistome: A Community of  
770 Multi-Drug Resistant Bacteria, PLoS ONE. 8 (2013) 65567.  
771 <https://doi.org/10.1371/journal.pone.0065567>.
- 772 [65] J.B. Emerson, R.I. Adams, C.M.B. Román, B. Brooks, D.A. Coil, K. Dahlhausen,  
773 H.H. Ganz, E.M. Hartmann, T. Hsu, N.B. Justice, I.G. Paulino-Lima, J.C. Luongo,  
774 D.S. Lymeropoulou, C. Gomez-Silvan, B. Rothschild-Mancinelli, M. Balk, C.  
775 Huttenhower, A. Nocker, P. Vaishampayan, L.J. Rothschild, Schrödinger's microbes:  
776 Tools for distinguishing the living from the dead in microbial ecosystems,  
777 Microbiome. 5 (2017) 86. <https://doi.org/10.1186/s40168-017-0285-3>.
- 778 [66] L.R. Thompson, J.G. Sanders, D. McDonald, A. Amir, J. Ladau, K.J. Locey, R.J.  
779 Prill, A. Tripathi, S.M. Gibbons, G. Ackermann, J.A. Navas-Molina, S. Janssen, E.  
780 Kopylova, Y. Vázquez-Baeza, A. González, J.T. Morton, S. Mirarab, Z.Z. Xu, L.  
781 Jiang, M.F. Haroon, J. Kanbar, Q. Zhu, S.J. Song, T. Kosciulek, N.A. Bokulich, J.  
782 Lefler, C.J. Brislawn, G. Humphrey, S.M. Owens, J. Hampton-Marcell, D. Berg-  
783 Lyons, V. McKenzie, N. Fierer, J.A. Fuhrman, A. Clauset, R.L. Stevens, A. Shade,  
784 K.S. Pollard, K.D. Goodwin, J.K. Jansson, J.A. Gilbert, R. Knight, J.L. Agosto Rivera,  
785 L. Al-Moosawi, J. Alverdy, K.R. Amato, J. Andras, L.T. Angenent, D.A.  
786 Antonopoulos, A. Apprill, D. Armitage, K. Ballantine, J. Bárta, J.K. Baum, A. Berry,  
787 A. Bhatnagar, M. Bhatnagar, J.F. Biddle, L. Bittner, B. Boldgiv, E. Bottos, D.M.  
788 Boyer, J. Braun, W. Brazelton, F.Q. Brearley, A.H. Campbell, J.G. Caporaso, C.  
789 Cardona, J.L. Carroll, S.C. Cary, B.B. Casper, T.C. Charles, H. Chu, D.C. Claar, R.G.  
790 Clark, J.B. Clayton, J.C. Clemente, A. Cochran, M.L. Coleman, G. Collins, R.R.  
791 Colwell, M. Contreras, B.B. Crary, S. Creer, D.A. Cristol, B.C. Crump, D. Cui, S.E.  
792 Daly, L. Davalos, R.D. Dawson, J. Defazio, F. Delsuc, H.M. Dionisi, M.G.  
793 Dominguez-Bello, R. Dowell, E.A. Dubinsky, P.O. Dunn, D. Ercolini, R.E. Espinoza,  
794 V. Ezenwa, N. Fenner, H.S. Findlay, I.D. Fleming, V. Fogliano, A. Forsman, C.  
795 Freeman, E.S. Friedman, G. Galindo, L. Garcia, M.A. Garcia-Amado, D. Garshelis,  
796 R.B. Gasser, G. Gerds, M.K. Gibson, I. Gifford, R.T. Gill, T. Giray, A. Gittel, P.  
797 Golyshin, D. Gong, H.P. Grossart, K. Guyton, S.J. Haig, V. Hale, R.S. Hall, S.J.  
798 Hallam, K.M. Handley, N.A. Hasan, S.R. Haydon, J.E. Hickman, G. Hidalgo, K.S.

- 799 Hofmockel, J. Hooker, S. Hulth, J. Hultman, E. Hyde, J.D. Ibáñez-Álamo, J.D.  
800 Jastrow, A.R. Jex, L.S. Johnson, E.R. Johnston, S. Joseph, S.D. Jurburg, D.  
801 Jurelevicius, A. Karlsson, R. Karlsson, S. Kauppinen, C.T.E. Kellogg, S.J. Kennedy,  
802 L.J. Kerkhof, G.M. King, G.W. Kling, A. v. Koehler, M. Krezalek, J. Kueneman, R.  
803 Lamendella, E.M. Landon, K. Lanede Graaf, J. LaRoche, P. Larsen, B. Laverock, S.  
804 Lax, M. Lentino, I.I. Levin, P. Liancourt, W. Liang, A.M. Linz, D.A. Lipson, Y. Liu,  
805 M.E. Lladser, M. Lozada, C.M. Spirito, W.P. MacCormack, A. MacRae-Crerar, M.  
806 Magris, A.M. Martín-Platero, M. Martín-Vivaldi, L.M. Martínez, M. Martínez-Bueno,  
807 E.M. Marzinelli, O.U. Mason, G.D. Mayer, J.M. McDevitt-Irwin, J.E. McDonald, K.L.  
808 McGuire, K.D. McMahan, R. McMinds, M. Medina, J.R. Mendelson, J.L. Metcalf, F.  
809 Meyer, F. Michelangeli, K. Miller, D.A. Mills, J. Minich, S. Mocali, L. Moitinho-  
810 Silva, A. Moore, R.M. Morgan-Kiss, P. Munroe, D. Myrold, J.D. Neufeld, Y. Ni,  
811 G.W. Nicol, S. Nielsen, J.I. Nissimov, K. Niu, M.J. Nolan, K. Noyce, S.L. O'Brien, N.  
812 Okamoto, L. Orlando, Y.O. Castellano, O. Osuolale, W. Oswald, J. Parnell, J.M.  
813 Peralta-Sánchez, P. Petraitis, C. Pfister, E. Pilon-Smits, P. Piombino, S.B. Pointing,  
814 F.J. Pollock, C. Potter, B. Prithiviraj, C. Quince, A. Rani, R. Ranjan, S. Rao, A.P.  
815 Rees, M. Richardson, U. Riebesell, C. Robinson, K.J. Rockne, S.M. Rodriguezl, F.  
816 Rohwer, W. Roundstone, R.J. Safran, N. Sangwan, V. Sanz, M. Schrenk, M.D.  
817 Schrenzel, N.M. Scott, R.L. Seger, A. Seguinorlando, L. Seldin, L.M. Seyler, B.  
818 Shakhsher, G.M. Sheets, C. Shen, Y. Shi, H. Shin, B.D. Shogan, D. Shutler, J. Siegel,  
819 S. Simmons, S. Sjöling, D.P. Smith, J.J. Soler, M. Sperling, P.D. Steinberg, B.  
820 Stephens, M.A. Stevens, S. Taghavi, V. Tai, K. Tait, C.L. Tan, N. Taş, D.L. Taylor, T.  
821 Thomas, I. Timling, B.L. Turner, T. Urich, L.K. Ursell, D. van der Lelie, W. van  
822 Treuren, L. van Zwieten, D. Vargas-Robles, R.V. Thurber, P. Vitaglione, D.A. Walker,  
823 W.A. Walters, S. Wang, T. Wang, T. Weaver, N.S. Webster, B. Wehrle, P.  
824 Weisenhorn, S. Weiss, J.J. Werner, K. West, A. Whitehead, S.R. Whitehead, L.A.  
825 Whittingham, E. Willerslev, A.E. Williams, S.A. Wood, D.C. Woodhams, Y. Yang, J.  
826 Zaneveld, I. Zarraindia, Q. Zhang, H. Zhao, A communal catalogue reveals Earth's  
827 multiscale microbial diversity, *Nature*. 551 (2017) 457–463.  
828 <https://doi.org/10.1038/nature24621>.
- 829 [67] R. Sapkota, S. Santos, P. Farias, P.H. Krogh, A. Winding, Insights into the  
830 earthworm gut multi-kingdom microbial communities, *Science of the Total*  
831 *Environment*. 727 (2020) 138301. <https://doi.org/10.1016/j.scitotenv.2020.138301>.



- 832 [68] E. Swart, T. Goodall, P. Kille, D.J. Spurgeon, C. Svendsen, The earthworm  
833 microbiome is resilient to exposure to biocidal metal nanoparticles, *Environmental*  
834 *Pollution*. 267 (2020) 115633. <https://doi.org/10.1016/j.envpol.2020.115633>.
- 835 [69] M. Aira, M. Pérez-Losada, J. Domínguez, Diversity, structure and sources of  
836 bacterial communities in earthworm cocoons, *Scientific Reports*. 8 (2018) 1–9.  
837 <https://doi.org/10.1038/s41598-018-25081-9>.
- 838 [70] B.A. Knapp, S.M. Podmirseg, J. Seeber, E. Meyer, H. Insam, Diet-related  
839 composition of the gut microbiota of *Lumbricus rubellus* as revealed by a molecular  
840 fingerprinting technique and cloning, *Soil Biology and Biochemistry*. 41 (2009) 2299–  
841 2307. <https://doi.org/10.1016/j.soilbio.2009.08.011>.
- 842 [71] A. Singh, D.P. Singh, R. Tiwari, K. Kumar, R.V. Singh, S. Singh, R. Prasanna, A.K.  
843 Saxena, L. Nain, Taxonomic and functional annotation of gut bacterial communities of  
844 *Eisenia foetida* and *Perionyx excavatus*, *Microbiological Research*. 175 (2015) 48–56.  
845 <https://doi.org/10.1016/j.micres.2015.03.003>.
- 846 [72] M. Sun, H. Chao, X. Zheng, S. Deng, M. Ye, F. Hu, Ecological role of earthworm  
847 intestinal bacteria in terrestrial environments: A review, *Science of the Total*  
848 *Environment*. 740 (2020) 140008. <https://doi.org/10.1016/j.scitotenv.2020.140008>.
- 849 [73] S.K. Davidson, R. Powell, S. James, A global survey of the bacteria within  
850 earthworm nephridia, *Molecular Phylogenetics and Evolution*. 67 (2013) 188–200.  
851 <https://doi.org/10.1016/j.ympev.2012.12.005>.
- 852 [74] M.B. Lund, K.U. Kjeldsen, A. Schramm, The earthworm-*Verminephrobacter*  
853 symbiosis: An emerging experimental system to study extracellular symbiosis,  
854 *Frontiers in Microbiology*. 5 (2014) 128. <https://doi.org/10.3389/fmicb.2014.00128>.
- 855 [75] A.B. Meier, S. Hunger, H.L. Drake, Differential engagement of fermentative taxa in  
856 gut contents of the earthworm *Lumbricus terrestris*, *Applied and Environmental*  
857 *Microbiology*. 84 (2018). <https://doi.org/10.1128/AEM.01851-17>.
- 858 [76] L. Zeibich, O. Schmidt, H.L. Drake, Fermenters in the earthworm gut: Do transients  
859 matter?, *FEMS Microbiology Ecology*. 95 (2019) 221.  
860 <https://doi.org/10.1093/femsec/fiy221>.

- 861 [77] M.J. Saavedra, S. Guedes-Novais, A. Alves, P. Rema, M. Tação, A. Correia, A.  
862 Martínez-Murcia, Resistance to  $\beta$ -lactam antibiotics in *Aeromonas hydrophila* isolated  
863 from rainbow trout (*Oncorhynchus mykiss*), *International Microbiology*. 7 (2004)  
864 207–211. <https://doi.org/10.2436/im.v7i3.9472>.
- 865 [78] M. Zdanowicz, Z.J. Mudryk, P. Perliński, Abundance and antibiotic resistance of  
866 *Aeromonas* isolated from the water of three carp ponds, *Veterinary Research*  
867 *Communications*. 44 (2020) 9–18. <https://doi.org/10.1007/s11259-020-09768-x>.
- 868 [79] T. Skwor, S. Stringer, J. Haggerty, J. Johnson, S. Duhr, M. Johnson, M. Seckinger,  
869 M. Stemme, Prevalence of potentially pathogenic antibiotic-resistant *aeromonas* spp.  
870 in treated urban wastewater effluents versus recipient riverine populations: A 3-year  
871 comparative study, *Applied and Environmental Microbiology*. 86 (2020) 2053–2072.  
872 <https://doi.org/10.1128/AEM.02053-19>.
- 873 [80] D.H. Marks, E.L. Cooper, *Aeromonas hydrophila* in the Coelomic Cavity of the  
874 Earthworms *Lumbricus terrestris* and *Eisenia foetida*, *Journal of Invertebrate*  
875 *Pathology*. 29 (1977) 382–383. [https://doi.org/10.1016/S0022-2011\(77\)80047-5](https://doi.org/10.1016/S0022-2011(77)80047-5).
- 876 [81] Y. Jiang, J. Wang, S. Muhammad, A. Zhou, R. Hao, Y. Wu, How do earthworms  
877 affect decomposition of residues with different quality apart from fragmentation and  
878 incorporation?, *Geoderma*. 326 (2018) 68–75.  
879 <https://doi.org/10.1016/j.geoderma.2018.04.013>.
- 880 [82] A.H.A.M. van Hoek, D. Mevius, B. Guerra, P. Mullany, A.P. Roberts, H.J.M. Aarts,  
881 Acquired antibiotic resistance genes: An overview, *Frontiers in Microbiology*. 2  
882 (2011). <https://doi.org/10.3389/fmicb.2011.00203>.

883

884

885

886

## 887 **6. Acknowledgements**

888 This study acknowledges PhD studentship funding from the Scenario NERC Doctoral  
889 Training Partnership grant NE/L002566/1.

890 Table 1. Antibiotic types and concentrations used to amend agar media for the production of  
891 'axenic' earthworms

| <b>Antibiotic</b> | <b>Antibiotic concentration (<math>\mu\text{g ml}^{-1}</math> agar)</b> |
|-------------------|-------------------------------------------------------------------------|
| Cycloheximide     | 150 <sup>a</sup>                                                        |
| Ampicillin        | 100                                                                     |
| Ciprofloxacin     | 50                                                                      |
| Nalidixic acid    | 50 <sup>a</sup>                                                         |
| Gentamicin        | 50 <sup>a</sup>                                                         |

892 <sup>a</sup> Antibiotic concentration used in Whiston and Seal (1988)

893

894

895

896

897

898

899

900

901

902

903

904

905

906

907

908

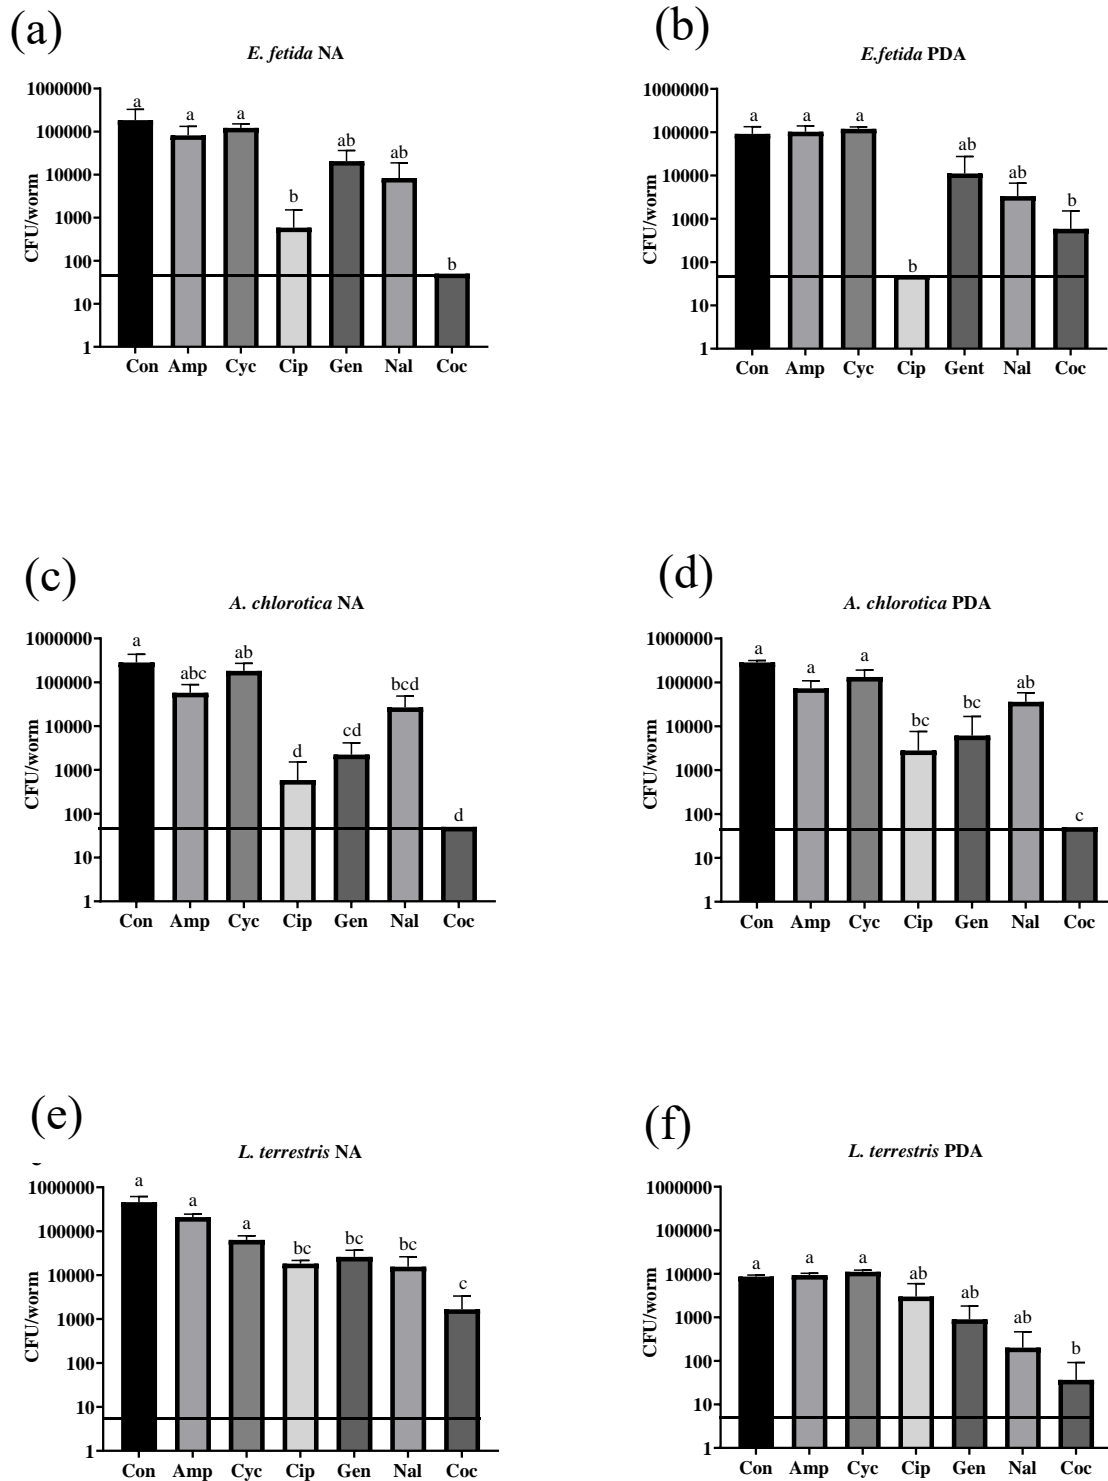

909

910 Figure 1. The effect of antibiotic treatment on culturable microbial abundance (Colony  
 911 Forming Units; CFU) associated with *E. fetida*, *A. chlorotica* and *L. terrestris* on nutrient  
 912 agar (NA) and potato dextrose agar (PDA) plates. Con = control; Amp = ampicillin; Cyc =  
 913 cycloheximide; Cip = ciprofloxacin; Gen = gentamicin; Nal = nalidixic acid; Coc = Cocktail.  
 914 Values are means  $\pm$  SE (n = 3). Different letters indicate significant differences between  
 915 antibiotic treatments for the same agar media and the same earthworm species (Tukey HSD  
 916 test;  $\alpha = 0.05$ ). The horizontal line represents the limit of detection for the method of 50  
 917 CFU/worm (*E. fetida* and *A. chlorotica*) or 5 CFU/worm (*L. terrestris*).

918

919

920

921

922

923

924

925

926

927

928

929

930

931

932

933

934

935

936

937

938

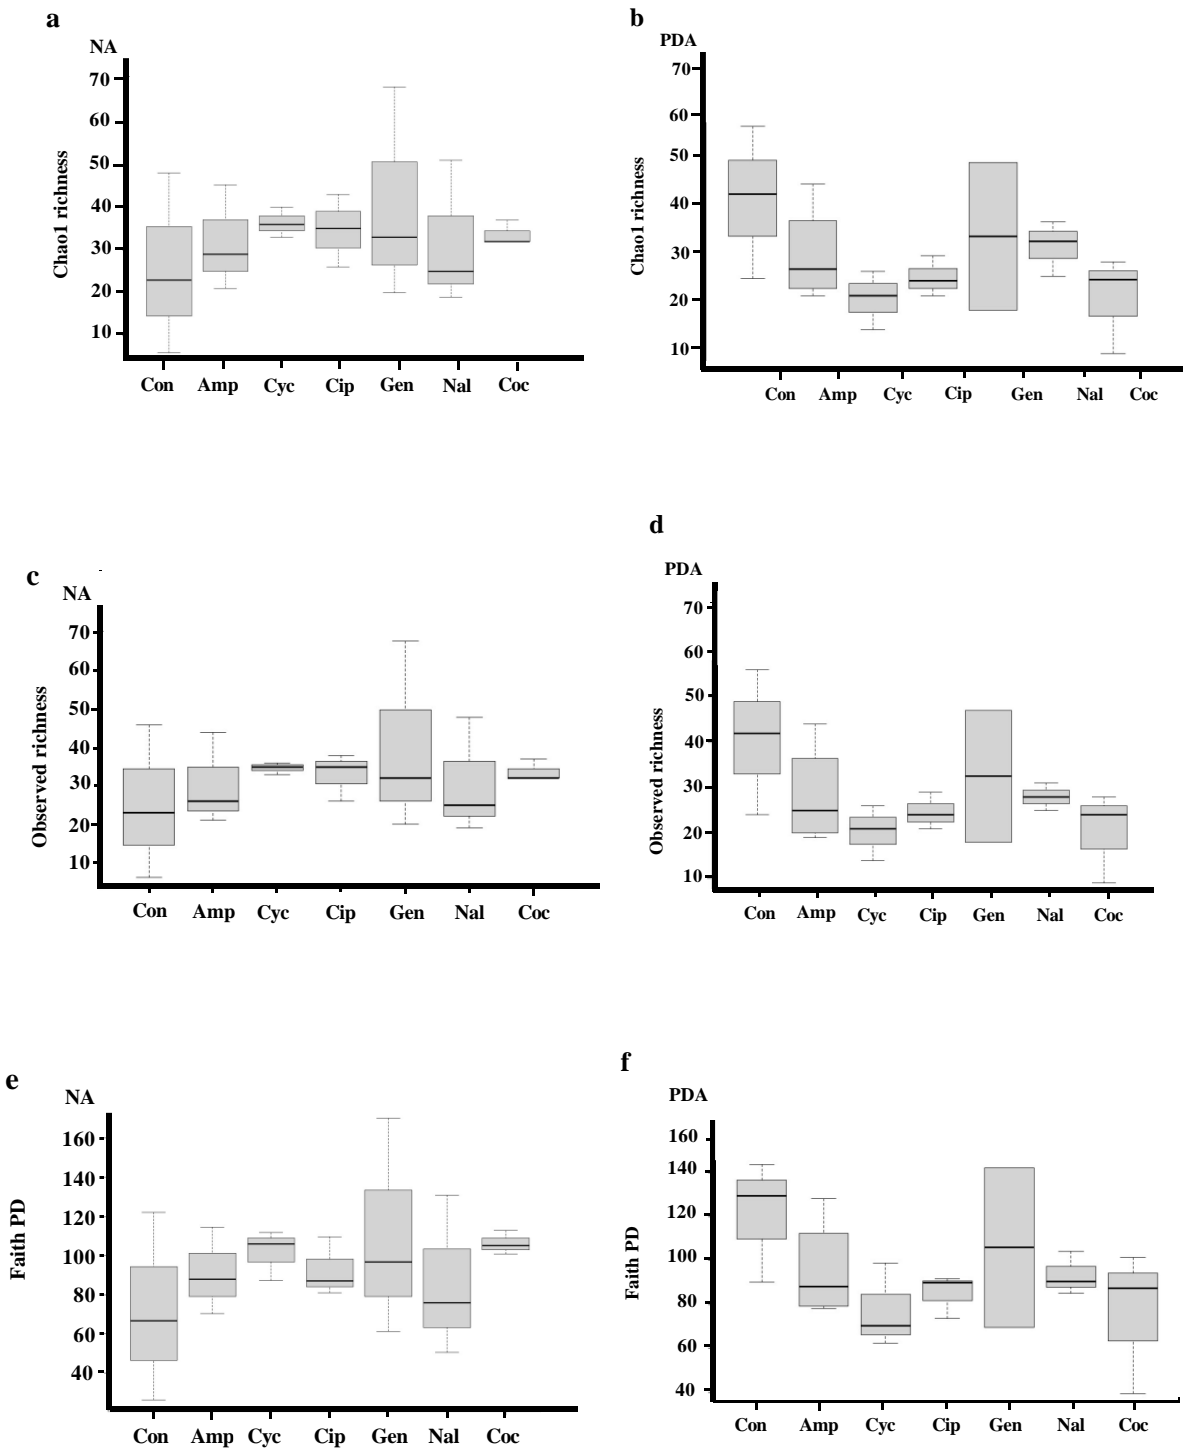

Figure 2. Box plots of ChaoI estimated (a, b) and observed (c, d) Amplicon Sequence Variant (ASV) richness and Faith's Phylogenetic Diversity (e, f) for *L. terrestris*-associated culturable bacterial communities for control and antibiotic-treated earthworm individuals (n=3) as cultured on nutrient agar (NA; a, c, e) and potato dextrose agar (PDA; b, d, f). Con = control; Amp = ampicillin; Cyc = cycloheximide; Cip = ciprofloxacin; Gen = gentamicin; Nal = nalidixic acid; Coc = Cocktail.

939

(NA)

940

941

942

943

944

945

946

947

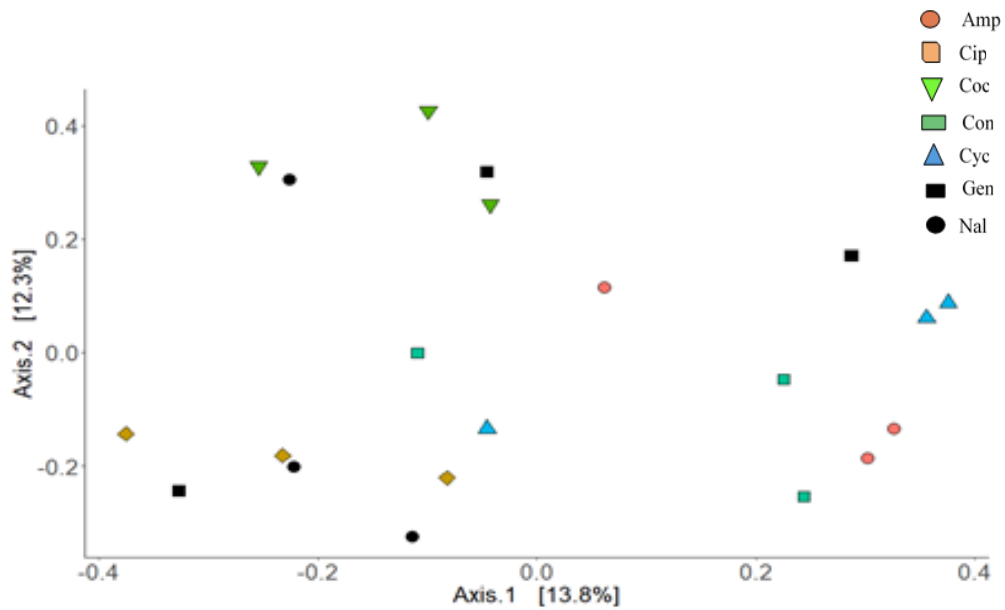

(PDA)

948

949

950

951

952

953

954

955

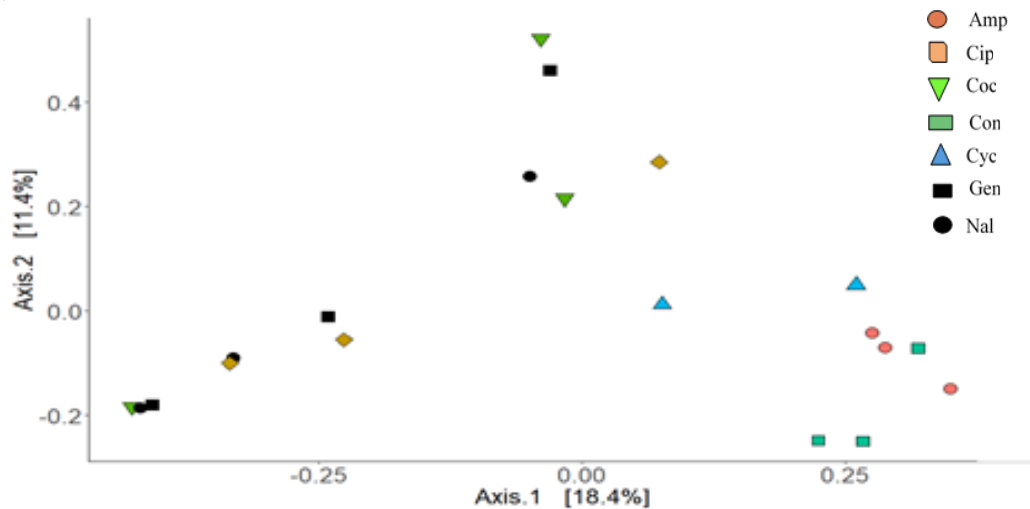

Figure 3. Principal coordinates analysis ordination based on Jaccard distances examining the similarity of composition of culturable bacterial communities for control and antibiotic-treated earthworm individuals (n=3) as determined by 16S rDNA amplicon sequencing of colonies cultured on NA and PDA. Con = control; Amp = ampicillin; Cyc = cycloheximide; Cip = ciprofloxacin; Gen = gentamicin; Nal = nalidixic acid; Coc = Cocktail.

956

957

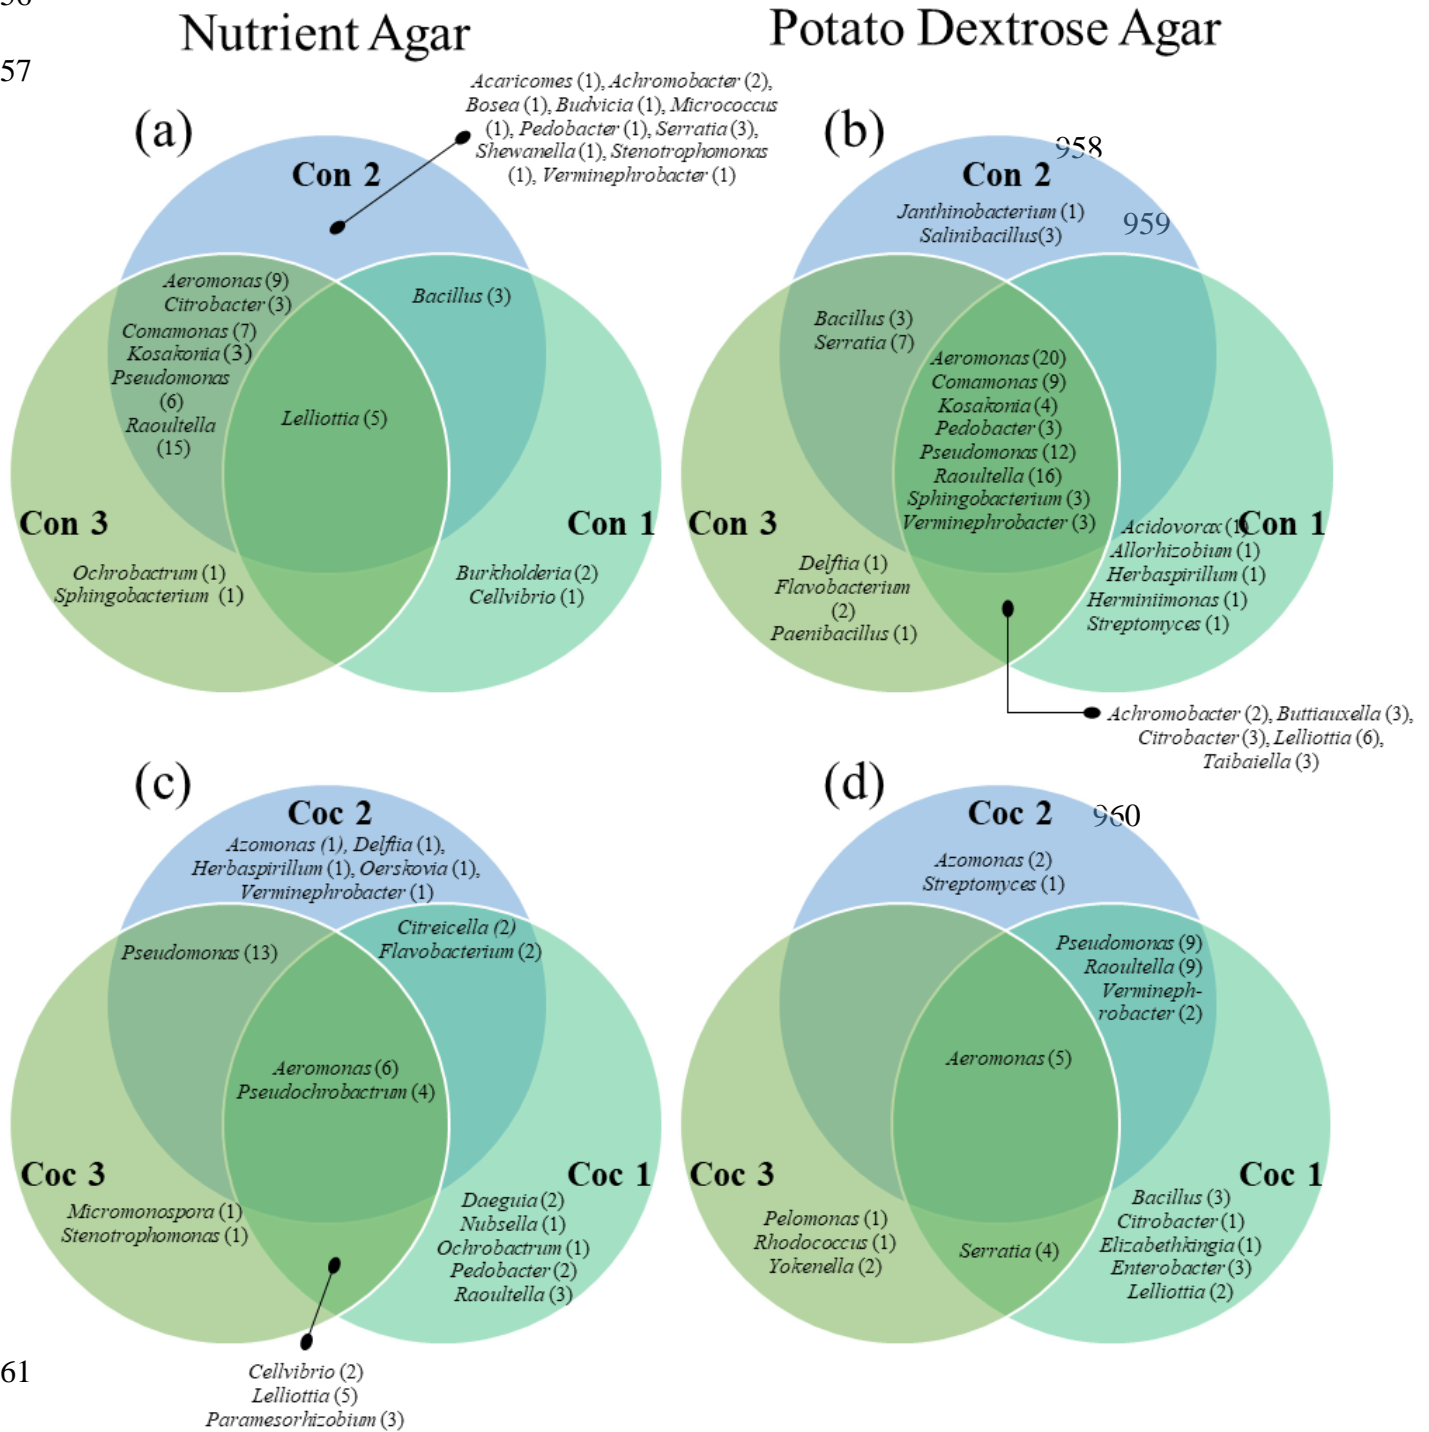

961

962

963

Figure 4. Venn diagram visualisation of genera that are unique or common to more than one earthworm replicate individual within the control (a, b; replicates Con 1, Con 2, Con 3) and cocktail (c, d; replicates Coc 1, Coc 2, Coc 3) treatments on nutrient agar (NA; a, c) and potato dextrose agar (PDA; b, d). The numbers in the brackets are the number of ASV representatives within each genera
